# Supplementary material
Source: publisher figshare collection journal article supplement (https://acs.figshare.com/ndownloader/files/4600396)
Supplement: Supplementary file 1 [file 4600396]

## Supporting Information for

### Partial Hydrogenation of 1,3-Butadiene on Hydrogen-Precovered Pd(110) in the Balance of $\pi$ -bonded C<sub>4</sub> Hydrocarbon Reactions

Satoshi Katano<sup>†</sup>, Hiroyuki S. Kato<sup>†</sup>, Maki Kawai<sup>†,‡,\*</sup> and Kazunari Domen<sup>§</sup>

<sup>†</sup>*Surface Chemistry Laboratory, RIKEN, 2-1 Hirosawa, Wako, Saitama 351-0198, Japan*

<sup>‡</sup>*Graduate School of Frontier Sciences, University of Tokyo, 5-1-5 Kashiwanoha, Kashiwa, Chiba 277-8651, Japan*

<sup>§</sup>*Department of Chemical System Engineering, University of Tokyo, 7-3-1 Hongo, Bunkyo-ku, Tokyo 113-8656, Japan*

\* Corresponding author:

Maki Kawai

E-mail: maki@riken.jp Tel : +81-48-467-9405 Fax : +81-48-462-4663

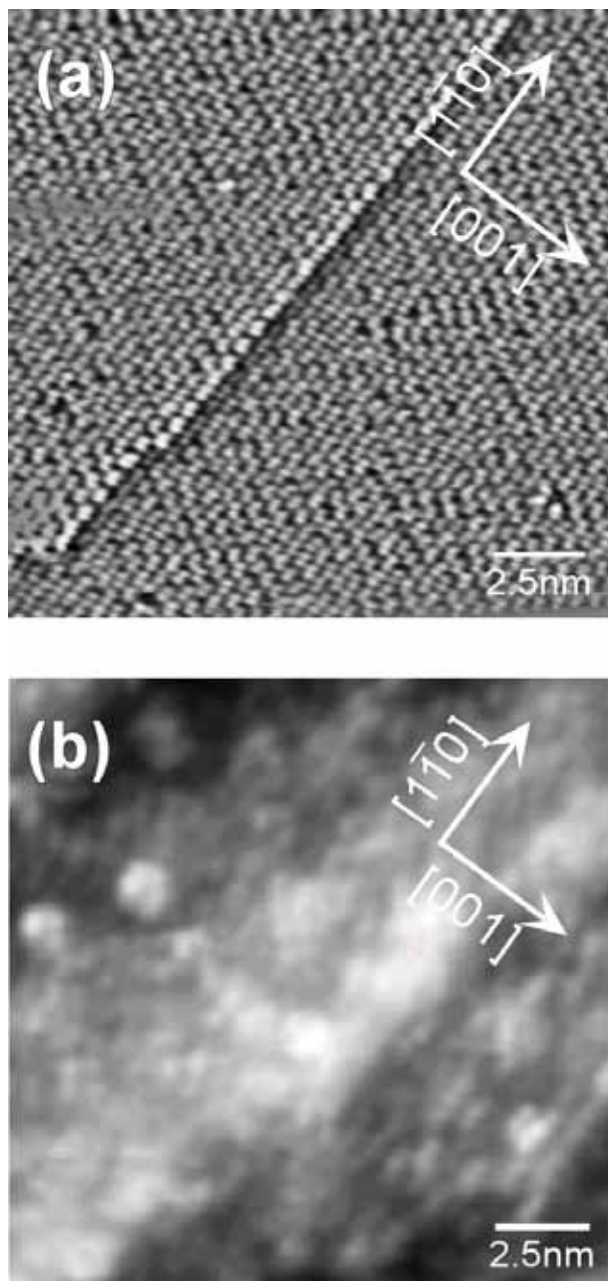

**Figure S1.** STM images of 1,3-butadiene adsorbed on H(1.0 ML)/Pd(110) surface at 100 K, followed by heating to (a) 130 K (below the decomposition temperature of 1,3-butadiene) and (b) 450 K (above the decomposition temperature of 1,3-butadiene). Both STM images were obtained by the constant current mode with the tunneling current of 0.9 nA and sample bias of  $-100$  mV.

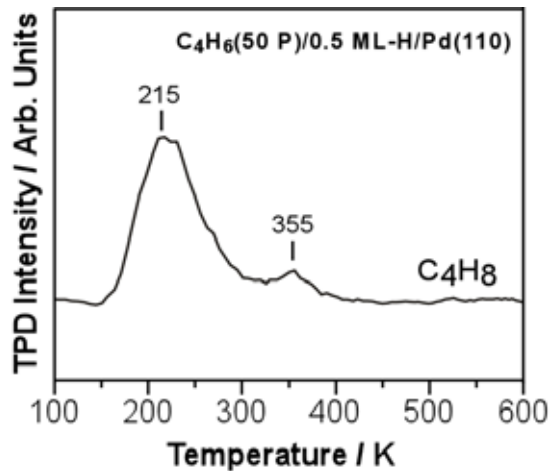

**Figure S2.** TPD spectrum of butene ( $C_4H_8$ ) obtained from 1,3-butadiene ( $C_4H_6$ ) adsorbed on less hydrogen-preadsorbed Pd(110) surface, i.e., H(0.5 ML)/Pd(110). The spectrum was obtained at the heating rate of 6 K/s. The peak appeared at 215 K is assigned to the interaction with pre-adsorbed hydrogen atoms. On the other hand, the desorption peak appeared at 355 K is assigned to self-hydrogenation of 1,3-butadiene, which is close to the decomposition temperature of 1,3-butadiene. The intensity of latter peak is decreased when TPD experiments were performed at higher H coverages (as shown in Figure 5(a)).

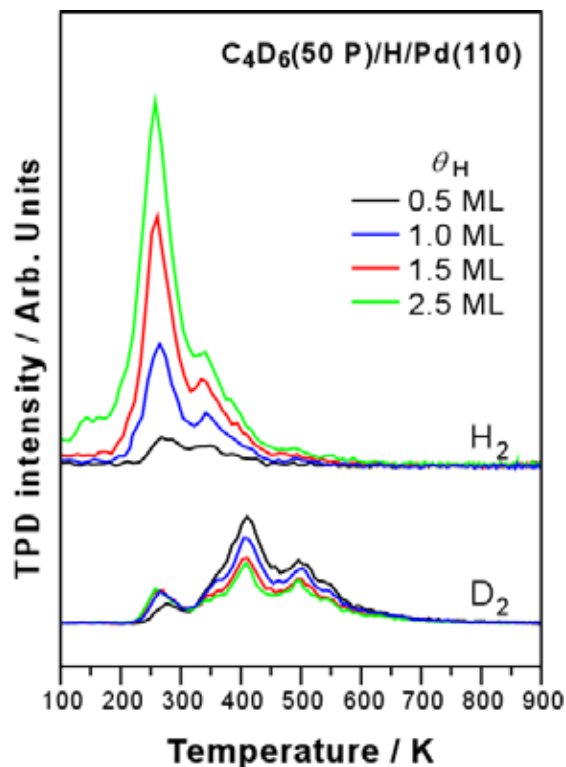

**Figure S3.** TPD spectra of hydrogen ( $\text{H}_2$  and  $\text{D}_2$ ) obtained from deuteride 1,3-butadiene ( $\text{C}_4\text{D}_6$ ) adsorbed on  $\text{H}(0.5, 1.0, 1.5 \text{ and } 2.5 \text{ ML})/\text{Pd}(110)$  surface. All spectra were obtained at the heating rate of 6 K/s. We have used deuteride 1,3-butadiene ( $\text{C}_4\text{D}_6$ ) to discriminate between the hydrogen desorption from pre-adsorbed hydrogen atoms and that from the 1,3-butadiene decomposition. The peak observed at 260 K in  $\text{H}_2$  desorption spectra is assigned to the hydrogen desorbed from the subsurface ( $\beta_1$  state) site. The intensity of the desorption peak at 260 K was monotonously increased with increasing the coverage of pre-adsorbed H, suggesting that excess hydrogen were desorbed from the subsurface site. The desorption peak at 260 K was decreased when 1,3-butadiene coverage was increased and hydrogen coverage retained constant, which suggests that subsurface hydrogen atoms react with 1,3-butadiene. Meanwhile, the decrease in the desorption amount of  $\text{D}_2$  with increasing the H coverage can be explained by the unreacted 1,3-butadiene molecules remained on the surface below decomposition temperature.
